# Supplementary material
Source: ML conference proceedings conference paper supplement (https://proceedings.neurips.cc/paper_files/paper/2019/hash/06bf16f1f0372a63d520eac6cf7c5af7-Abstract.html)
Supplement: Supplementary file [file 06bf16f1f0372a63d520eac6cf7c5af7-Supplemental.zip]

---

# Appendix: Distribution Learning of a Random Spatial Field with a Location-Unaware Mobile Sensor

---

**Meera Pai and Animesh Kumar**  
 Electrical Engineering  
 Indian Institute of Technology Bombay  
 Mumbai 400076 India  
 meeravpai, animesh@ee.iitb.ac.in

## A

The following results are proved in Appendix A in Kumar [2017].

$$\mathbb{E}[\theta|M=m] = \frac{1}{m} - \frac{\mathbb{E}[R_M^2|M=m]}{m} \quad (1)$$

since  $R_M^2 \leq \frac{\lambda^2}{n^2}$ , for large sampling rate, the second term in the above equation is negligible. It is shown(in Appendix A in Kumar [2017]) that

$$ma_m + m(m-1)b_m = \mathbb{E}[R_M^2|M=m]$$

or

$$b_m = \frac{1}{m(m-1)} (-ma_m + \mathbb{E}[R_M^2|M=m]) \quad (2)$$

where  $a_m = \mathbb{E}[(\theta_1 - \frac{1}{m})^2 | M=m]$  and  $b_m = \mathbb{E}[(\theta_1 - \frac{1}{m})(\theta_2 - \frac{1}{m}) | M=m]$ .

The mean squared error between location  $s$  and  $S_{\lfloor (M-1)s \rfloor + 1}$  conditioned on  $M=m$  is

$$\mathbb{E} \left[ |S_{l(M,s)} - s|^2 \middle| M=m \right] \quad (3)$$

$$= \mathbb{E} \left[ \left| S_{l(M,s)} - \frac{l(M,s)}{M} + \frac{l(M,s)}{M} - s \right|^2 \middle| M=m \right] \quad (4)$$

$$= \mathbb{E} \left[ \left| S_{l(M,s)} - \frac{l(M,s)}{m} \right|^2 \middle| M=m \right] + \mathbb{E} \left[ \left| \frac{l(M,s)}{m} - s \right|^2 \middle| M=m \right] \quad (5)$$

$$+ 2\mathbb{E} \left[ \left( S_{l(M,s)} - \frac{l(M,s)}{m} \right) \left( \frac{l(M,s)}{m} - s \right) \middle| M=m \right]. \quad (6)$$

The term  $\frac{l(M,s)}{m} - s$  in the above equation can be simplified as,  $\frac{l(M,s)}{m} - s = \frac{\lfloor (m-1)s \rfloor + 1}{m} - s \leq \frac{1}{m}$ . Therefore,

$$\begin{aligned} \mathbb{E} \left[ |S_{l(M,s)} - s|^2 \middle| M=m \right] &\leq \mathbb{E} \left[ \left| S_{l(M,s)} - \frac{l(M,s)}{m} \right|^2 \middle| M=m \right] \\ &\quad + \frac{1}{m^2} + 2\frac{1}{m} \mathbb{E} \left[ S_{l(M,s)} - \frac{l(M,s)}{m} \middle| M=m \right]. \end{aligned} \quad (7)$$

The first term in the Right hand side (RHS) of (7) is

$$\begin{aligned}
& \mathbb{E} \left[ \left| S_{l(M,s)} - \frac{l(M,s)}{m} \right|^2 \middle| M = m \right] \\
&= \mathbb{E} \left[ \left( \sum_{i=1}^{l(M,s)} \left( \theta_i - \frac{1}{m} \right) \right)^2 \middle| M = m \right] \\
&= \mathbb{E} \left[ \left( \sum_{i=1}^{l(M,s)} \sum_{j=1}^{l(M,s)} \left( \theta_i - \frac{1}{m} \right) \left( \theta_j - \frac{1}{m} \right) \right) \middle| M = m \right] \\
&= (l(m,s)) \mathbb{E} \left[ \left( \theta_i - \frac{1}{m} \right)^2 \middle| M = m \right] \\
&\quad + (l(m,s))(l(m,s) - 1) \mathbb{E} \left[ \left( \theta_i - \frac{1}{m} \right) \left( \theta_j - \frac{1}{m} \right) \middle| M = m \right] \text{ where } i \neq j \\
&\leq ((m-1)s+1)a_m + ((m-1)s+1)((m-1)s)b_m
\end{aligned}$$

where  $l(m,s) = \lfloor (m-1)s \rfloor + 1$ .

Substituting for  $b_m$  from equation (2) we get,

$$\mathbb{E} \left[ \left| S_{l(M,s)} - \frac{l(M,s)}{m} \right|^2 \middle| M = m \right] \tag{8}$$

$$\leq ((m-1)s+1)a_m + \frac{((m-1)s+1)((m-1)s)}{m(m-1)} \left( -ma_m + \frac{\lambda^2}{n^2} \right) \tag{9}$$

$$= ((m-1)s+1)a_m - ((m-1)s^2+s)a_m + \left( \frac{(m-1)s^2+s}{m} \right) \frac{\lambda^2}{n^2} \tag{10}$$

$$= (m-1)s(1-s)a_m + (1-s)a_m + \left( \frac{(m-1)s^2+s}{m} \right) \frac{\lambda^2}{n^2}. \tag{11}$$

The above equation can be simplified by substituting for  $a_m$  defined as

$$a_m = \mathbb{E} \left[ \left( \theta - \frac{1}{m} \right)^2 \middle| M = m \right] = \mathbb{E} \left[ \theta^2 - 2\frac{\theta}{m} + \frac{1}{m^2} \middle| M = m \right].$$

Since  $\mathbb{E}[\theta | M = m] = \frac{1}{m}$  from (1) and  $\mathbb{E}[\theta^2] \leq \frac{\lambda^2}{n^2}$ ,

$$a_m \leq \frac{\lambda^2}{n^2} - \frac{1}{m^2}.$$

Substituting the above upper bound in (11) we get

$$\mathbb{E} \left[ \left| S_{l(M,s)} - \frac{l(M,s)}{m} \right|^2 \middle| M = m \right] \tag{12}$$

$$\leq (m-1)s(1-s) \left( \frac{\lambda^2}{n^2} - \frac{1}{m^2} \right) + (1-s) \left( \frac{\lambda^2}{n^2} - \frac{1}{m^2} \right) + \left( \frac{(m-1)s^2+s}{m} \right) \frac{\lambda^2}{n^2}. \tag{13}$$

$$\tag{14}$$

By replacing  $(m - 1)$  by  $m$  and rearranging the terms in above equation we can write,

$$\mathbb{E} \left[ \left| S_{l(M,s)} - \frac{l(M,s)}{m} \right|^2 \middle| M = m \right] \quad (15)$$

$$\leq \left( ms(1-s) + 1 - s + s^2 + \frac{s}{m} \right) \frac{\lambda^2}{n^2} - (ms(1-s) + 1 - s) \frac{1}{m^2}. \quad (16)$$

$$(17)$$

The third term in the RHS of equation (7) can be simplified as

$$\mathbb{E} \left[ S_{l(M,s)} - \frac{l(M,s)}{m} \middle| M = m \right] = \mathbb{E} \left[ \sum_{i=1}^{l(M,s)} \theta_i - \frac{l(M,s)}{m} \middle| M = m \right] \quad (18)$$

$$= l(m,s) \mathbb{E}[\theta | M = m] - \frac{l(m,s)}{m} = 0. \quad (19)$$

Therefore, putting together equations (7) and (16), (19) we can write,

$$\mathbb{E} \left[ |S_{l(M,s)} - s|^2 \right] \quad (20)$$

$$\leq \left( \mathbb{E}[M]s(1-s) + 1 - s + s^2 + \frac{s}{\mathbb{E}[M]} \right) \frac{\lambda^2}{n^2} - (\mathbb{E}[M]s(1-s) + 1 - s) \frac{1}{\mathbb{E}[M]^2} + \frac{1}{\mathbb{E}[M]^2} \quad (21)$$

$$\leq \left( \mathbb{E}[M]s(1-s) + 1 - s + s^2 + \frac{s}{\mathbb{E}[M]} \right) \frac{\lambda^2}{n^2} \quad (22)$$

$$= (\mathbb{E}[M]s(1-s) + C) \frac{\lambda^2}{n^2}, \quad (23)$$

where C is a constant.

## B

The **Firt Symmetrization Lemma**[Pollard [2012]] states that: Let  $Z(t) : t \in T$  and  $Z'(t) : t \in T$  be independent stochastic processes sharing an index set  $T$ . Suppose there exist constants  $\beta > 0$  and  $\gamma > 0$  such that  $\mathbb{P}\{|Z'(t)| \leq \gamma\} \geq \beta$  for every  $t \in T$ , then

$$\mathbb{P}\{\sup_t |Z(t)| \geq \varepsilon\} \leq \frac{1}{\beta} \mathbb{P}\{\sup_t |Z(t) - Z'(t)| > \varepsilon - \gamma\} \quad (24)$$

Let us define  $Z(s) = S_{l(M,s)} - s$ . Let  $Z'(s)$  be independent of  $Z(s)$  sharing the same index set  $s \in [0, 1]$ , generated by a different set of sampling locations for the same number of total samples i.e  $Z'(s) = S'_{l(M,s)} - s$ .

Using the upper bound in (20) in Appendix A,

$$\begin{aligned} \mathbb{P} \left( \left| S'_{l(M,s)} - s \right| \leq \gamma \right) &= 1 - \mathbb{P} \left( \left| S'_{l(M,s)} - s \right| > \gamma \right) \\ &\geq 1 - \frac{\mathbb{E} \left[ \left| S'_{l(M,s)} - s \right|^2 \right]}{\gamma^2} \\ &\geq 1 - \left( \mathbb{E}[M]s(1-s) + 1 - s + s^2 + \frac{s}{\mathbb{E}[M]} \right) \frac{\lambda^2}{n^2 \gamma^2}. \end{aligned}$$

i.e.  $\mathbb{P}\{|Z'(s)| \leq \gamma\} \geq \beta$  where

$$\beta = 1 - \left( \mathbb{E}[M]s(1-s) + 1 - s + s^2 + \frac{s}{\mathbb{E}[M]} \right) \frac{\lambda^2}{n^2 \gamma^2}. \quad (25)$$

$\beta$  goes to 1 as  $n \rightarrow \infty$ .

Using the first symmetrization lemma we can write,

$$\begin{aligned} \mathbb{P}\left\{\sup_s |S_{l(M,s)} - s| > \varepsilon\right\} &\leq \frac{1}{\beta} \mathbb{P}\left\{\sup_s \left|S_{l(M,s)} - s - S'_{l(M,s)} + s\right| > \varepsilon - \gamma\right\} \\ &= \frac{1}{\beta} \mathbb{P}\left\{\sup_s \left|S_{l(M,s)} - S'_{l(M,s)}\right| > \varepsilon - \gamma\right\} \\ &= \frac{1}{\beta} \mathbb{P}\left\{\sup_s \left|\sum_{i=1}^{l(M,s)} (\theta_i - \theta'_i)\right| > \varepsilon - \gamma\right\}. \end{aligned}$$

Taking  $\gamma = \frac{\varepsilon}{2}$  in the above equation we get,

$$\mathbb{P}\left\{\sup_s |S_{l(M,s)} - s| > \varepsilon\right\} \leq \frac{1}{\beta} \mathbb{P}\left\{\sup_s \left|\sum_{i=1}^{l(M,s)} (\theta_i - \theta'_i)\right| > \frac{\varepsilon}{2}\right\} \quad (26)$$

Using the second symmetrization lemma[Pollard [2012]],

$$\mathbb{P}\left\{\sup_s |S_{l(M,s)} - s| > \varepsilon\right\} \leq \frac{2}{\beta} \mathbb{P}\left\{\sup_s \left|\sum_{i=1}^{l(M,s)} \sigma_i \theta_i\right| > \frac{\varepsilon}{4}\right\}.$$

where  $\sigma_1, \sigma_2, \sigma_3, \dots$  are i.i.d Rademacher random variables that are also independent of  $\theta_i, \theta'_i$  and  $\mathbb{P}\{\sigma_i = +1\} = \mathbb{P}\{\sigma_i = -1\} = \frac{1}{2}$ .

From Figure 1 we can see that,  $\left|\sum_{i=1}^{l(M,s)} \sigma_i \theta_i\right|$  reaches it maximum value when  $s$  becomes  $\frac{k}{M-1}$ . Therefore supremum over  $s$  can be written as maximum over  $\frac{k}{M-1}$ , i.e.

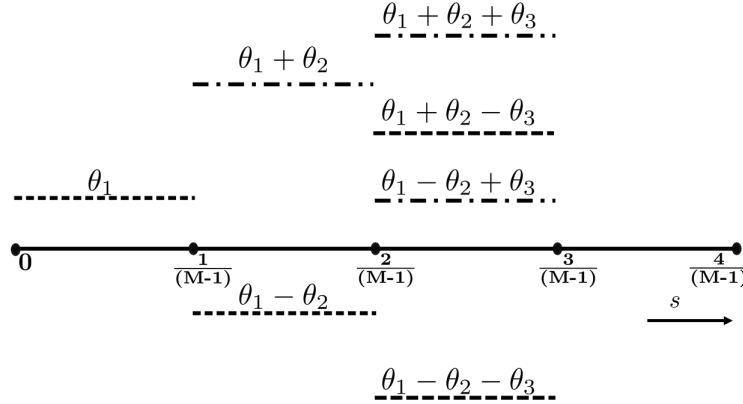

Figure 1:  $\sum_{i=1}^{\lfloor (M-1)s \rfloor + 1} \sigma_i \theta_i$  plotted against  $s$ . We can see that depending on the sign of  $\sigma_i, \theta_i$  either gets added or subtracted from  $\sum_{i=1}^{i-1} \sigma_k \theta_k$

$$\mathbb{P}\left\{\sup_s |S_{l(M,s)} - s| > \varepsilon\right\} \leq \frac{2}{\beta} \mathbb{P}\left\{\max_k \left|\sum_{i=1}^{k+1} \sigma_i \theta_i\right| > \frac{\varepsilon}{4}\right\} \text{ where } k = 0, 1, \dots, (M-1).$$

Using Chebyshev's inequality we get,

$$\mathbb{P}\left\{\sup_s |S_{l(M,s)} - s| > \varepsilon\right\} \leq \frac{2}{\beta} \frac{16}{\varepsilon^2} \mathbb{E} \left[ \max_k \left| \sum_{i=1}^{k+1} \sigma_i \theta_i \right|^2 \right]. \quad (27)$$

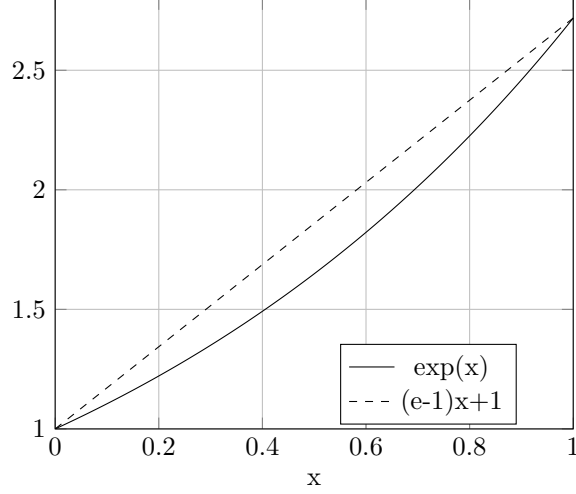

Figure 2: plot of  $\exp(x)$  and  $(e - 1)x + 1$  for  $x$  between 0 and 1

From Jensen's inequality,

$$\exp \left( s \mathbb{E} \left[ \max_k \left| \sum_{i=1}^{k+1} \sigma_i \theta_i \right|^2 \middle| M = m \right] \right) \quad (28)$$

$$\leq \mathbb{E} \left[ \exp \left( s \max_k \left| \sum_{i=1}^{k+1} \sigma_i \theta_i \right|^2 \right) \middle| M = m \right] \quad (29)$$

$$= \mathbb{E} \left[ \max_k \exp \left( s \left| \sum_{i=1}^{k+1} \sigma_i \theta_i \right|^2 \right) \middle| M = m \right] \quad (30)$$

$$= \mathbb{E} \left[ \max_k \exp \left( s \sum_{i=1}^{k+1} \sum_{j=1}^{k+1} \sigma_i \theta_i \sigma_j \theta_j \right) \middle| M = m \right] \quad (31)$$

$$= \mathbb{E} \left[ \max_k \exp \left( s \left( \sum_{i=1}^{k+1} \sigma_i^2 \theta_i^2 + \sum_{i=1}^{k+1} \sum_{j=1}^{k+1} \sigma_i \theta_i \sigma_j \theta_j \right) \right) \middle| M = m \right] \text{ where } i \neq j \quad (32)$$

$$\leq \mathbb{E} \left[ \max_k \exp \left( s \left( \sum_{i=1}^{k+1} \frac{\lambda^2}{n^2} + \sum_{i=1}^{k+1} \sum_{j=1}^{k+1} \sigma_i \theta_i \sigma_j \theta_j \right) \right) \middle| M = m \right] \quad (33)$$

$$= \mathbb{E} \left[ \max_k \exp \left( s \left( (k+1) \frac{\lambda^2}{n^2} + \sum_{i=1}^{k+1} \sum_{j=1}^{k+1} \sigma_i \theta_i \sigma_j \theta_j \right) \right) \middle| M = m \right] \quad (34)$$

$$\leq \mathbb{E} \left[ \max_k \exp \left( sm \frac{\lambda^2}{n^2} \right) \exp \left( s \sum_{i=1}^{k+1} \sum_{j=1}^{k+1} \sigma_i \theta_i \sigma_j \theta_j \right) \middle| M = m \right] \quad (35)$$

The maximum path length is one therefore,  $\left| \sum_{i=1}^{k+1} \sigma_i \theta_i \right|^2 \leq 1$ . This implies that,  $\sum_{i=1}^{k+1} \sum_{j=1}^{k+1} \sigma_i \theta_i \sigma_j \theta_j$  where  $i \neq j$  is less than 1. From figure 2 we can see that for  $0 \leq x \leq 1$ ,  $\exp(x) \leq (e - 1)x + 1$ . So, by replacing  $\exp \left( s \sum_{i=1}^{k+1} \sum_{j=1}^{k+1} \sigma_i \theta_i \sigma_j \theta_j \right)$  with

$(e-1)s \sum_{i=1}^{k+1} \sum_{j=1}^{k+1} \sigma_i \theta_i \sigma_j \theta_j + 1$  we get

$$\exp \left( s \mathbb{E} \left[ \max_k \left| \sum_{i=1}^{k+1} \sigma_i \theta_i \right|^2 \middle| M = m \right] \right) \quad (36)$$

$$\leq \mathbb{E} \left[ \exp \left( sm \frac{\lambda^2}{n^2} \right) \max_k \left( (e-1)s \sum_{i=1}^{k+1} \sum_{j=1}^{k+1} \sigma_i \theta_i \sigma_j \theta_j + 1 \right) \middle| M = m \right] \quad (37)$$

$$= \mathbb{E} \left[ \exp \left( sm \frac{\lambda^2}{n^2} \right) \left( 1 + \max_k (e-1)s \sum_{i=1}^{k+1} \sum_{j=1}^{k+1} \sigma_i \theta_i \sigma_j \theta_j \right) \middle| M = m \right] \quad (38)$$

$$(39)$$

Since  $\max_k (e-1)s \sum_{i=1}^{k+1} \sum_{j=1}^{k+1} \sigma_i \theta_i \sigma_j \theta_j \leq \sum_{k=0}^{m-1} (e-1)s \sum_{i=1}^{k+1} \sum_{j=1}^{k+1} \sigma_i \theta_i \sigma_j \theta_j$ ,

$$\exp \left( s \mathbb{E} \left[ \max_k \left| \sum_{i=1}^{k+1} \sigma_i \theta_i \right|^2 \middle| M = m \right] \right) \quad (40)$$

$$\leq \mathbb{E} \left[ \exp \left( sm \frac{\lambda^2}{n^2} \right) + \exp \left( sm \frac{\lambda^2}{n^2} \right) \sum_{k=0}^{m-1} (e-1)s \sum_{i=1}^{k+1} \sum_{j=1}^{k+1} \sigma_i \theta_i \sigma_j \theta_j \middle| M = m \right] \quad (41)$$

$$= \exp \left( sm \frac{\lambda^2}{n^2} \right) + \exp \left( sm \frac{\lambda^2}{n^2} \right) \sum_{k=0}^{m-1} (e-1)s \sum_{i=1}^{k+1} \sum_{j=1}^{k+1} \mathbb{E}[\sigma_i \theta_i \sigma_j \theta_j | M = m] \quad (42)$$

As  $\theta$  and  $\sigma$  are independent of each other and  $\mathbb{E}[\sigma] = 0$ ,  $\mathbb{E}[\sigma_i \theta_i \sigma_j \theta_j | M = m] = 0$  therefore,

$$\exp \left( s \mathbb{E} \left[ \max_k \left| \sum_{i=1}^{k+1} \sigma_i \theta_i \right|^2 \middle| M = m \right] \right) \leq \exp \left( sm \frac{\lambda^2}{n^2} \right) \quad (43)$$

Taking natural log on both sides of above equation gives,

$$\mathbb{E} \left[ \max_k \left| \sum_{i=1}^{k+1} \sigma_i \theta_i \right|^2 \middle| M = m \right] \leq m \frac{\lambda^2}{n^2}. \quad (44)$$

Therefore,

$$\mathbb{E} \left[ \max_k \left| \sum_{i=1}^{k+1} \sigma_i \theta_i \right|^2 \right] \leq \mathbb{E}[M] \frac{\lambda^2}{n^2}. \quad (45)$$

Substituting the above bound in 27 we get,

$$\mathbb{P}\{\sup_s |S_{l(M,s)} - s| > \varepsilon\} \leq \frac{2}{\beta} \frac{16}{\varepsilon^2} \mathbb{E}[M] \frac{\lambda^2}{n^2} \quad (46)$$

$$\leq \frac{2}{\beta} \frac{16}{\varepsilon^2} (n + \lambda - 1) \frac{\lambda^2}{n^2} \quad (47)$$

## References

- A. Kumar. On bandlimited field estimation from samples recorded by a location-unaware mobile sensor. *IEEE Transactions on Information Theory*, 63(4):2188–2200, April 2017.
- David Pollard. *Convergence of stochastic processes*. Springer Science & Business Media, 2012.
